# Supplementary material for: Self-supported hierarchical core–shell Co9S8@NiCo2O4 hollow nanoneedle arrays for asymmetric supercapacitors
Source: Royal Society of Chemistry journal article supplement (doi:10.1039/c9qi00117d), 2019-01-01
Supplement: c9qi00117d1.pdf [file c9qi00117d1.pdf]

**Self-supported hierarchical core-shell  $\text{Co}_9\text{S}_8@\text{NiCo}_2\text{O}_4$  hollow  
nanoneedle arrays for asymmetric supercapacitors**

*Fangfang Zhu<sup>a</sup>, Weijing Liu<sup>a</sup>, Yu Liu<sup>a</sup>, Weidong Shi<sup>a,\*</sup>*

*<sup>a</sup> School of Chemistry and Chemical Engineering, Jiangsu University, Zhenjiang,  
212013, P. R. China.*

*China.Tel: +86-511-88791800*

*\*E-mail: [swd1978@ujs.edu.cn](mailto:swd1978@ujs.edu.cn)*

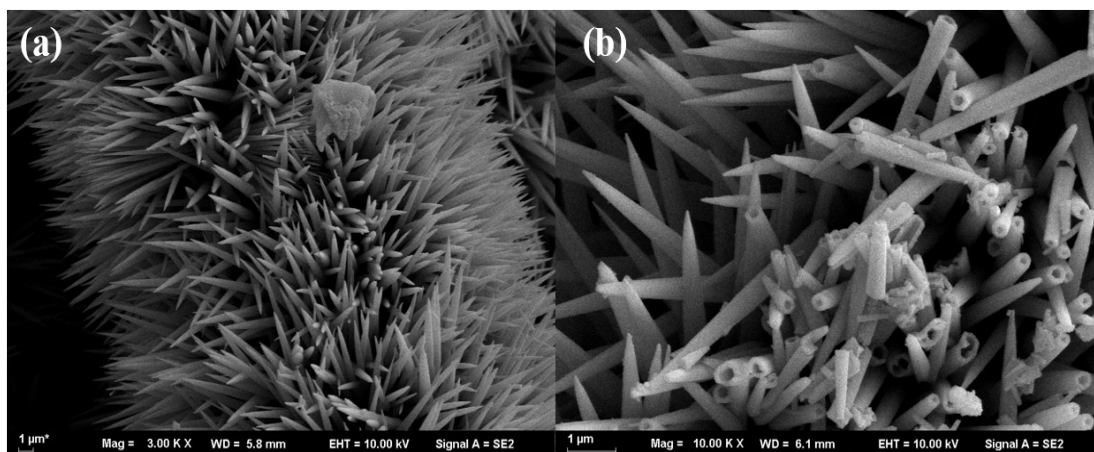

**Fig. S1** SEM images of pure  $\text{Co}_9\text{S}_8$  hollow nonneedles.

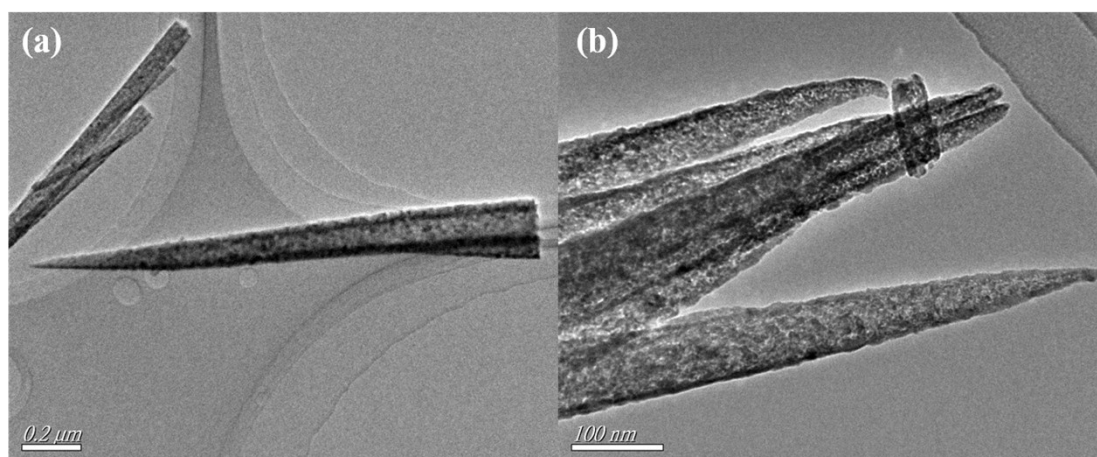

**Fig. S2** TEM images of pure  $\text{Co}_9\text{S}_8$  hollow nonneedles

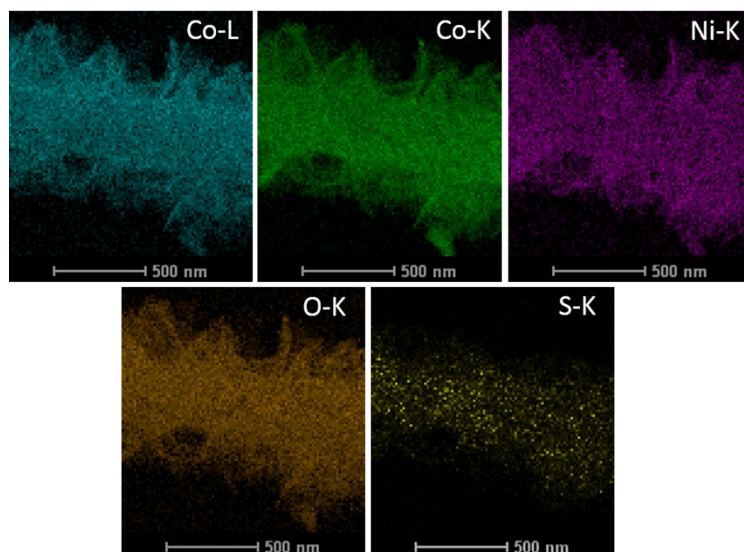

**Fig. S3** Elemental mapping images of Co-L(blue), Co-K(green), Ni(purple), O(orange), S(yellow) in  $\text{Co}_9\text{S}_8@\text{NiCo}_2\text{O}_4$  core-shell nanoneedles.

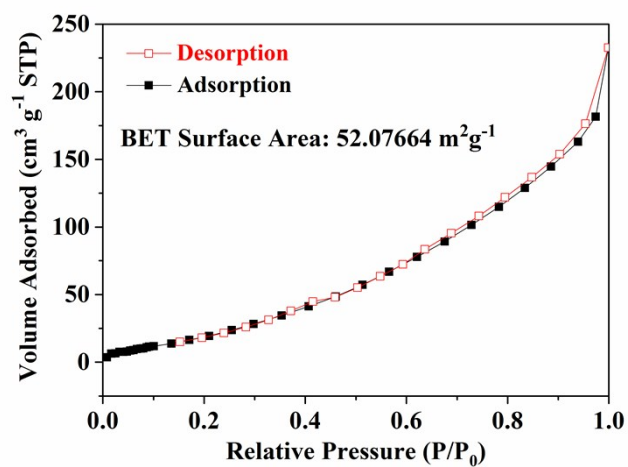

**Fig. S4**  $\text{N}_2$  adsorption-desorption isotherms for the hybrid  $\text{Co}_9\text{S}_8@\text{NiCo}_2\text{O}_4$  core-shell nanoneedles.

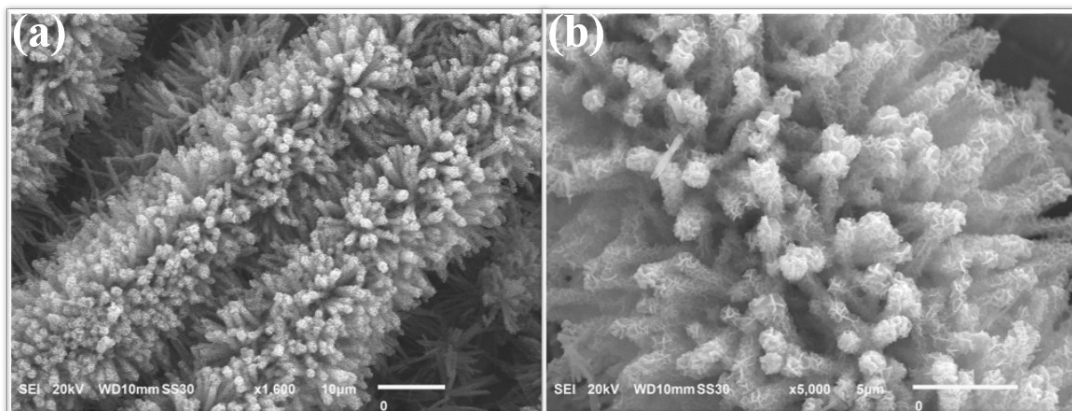

**Fig. S5** SEM image of the  $\text{Co}_9\text{S}_8@\text{NiCo}_2\text{O}_4$  core-shell nanoneedles after charging and discharging for 6000 cycles.

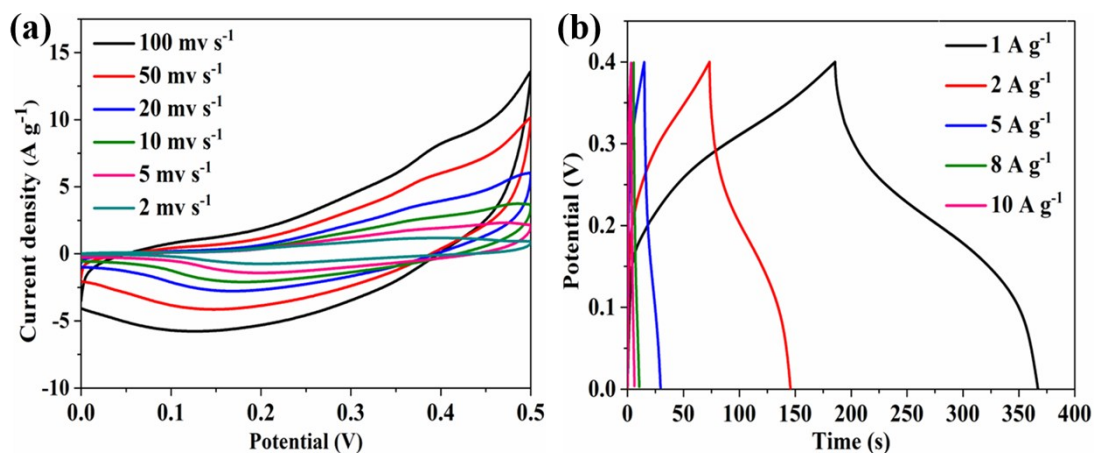

**Fig. S6** (a) CV curves of pure  $\text{NiCo}_2\text{O}_4$  electrode at various scan rate; (b) GCD curves of pure  $\text{NiCo}_2\text{O}_4$  electrode at different current densities.
